# Supplementary material for: Predicting Prognosis and IDH Mutation Status for Patients with Lower-Grade Gliomas Using Whole Slide Images
Source: bioRxiv or medRxiv preprint supplement (doi:10.1101/2021.01.21.21250241), 2021-01-22
Supplement: Supplementary file [file media-1.pdf]

# **Predicting Prognosis and IDH Mutation Status for Patients with Lower-Grade Gliomas Using Whole Slide Images**

Shuai Jiang, MHS<sup>1</sup>, George J. Zanazzi, MD, PhD<sup>2</sup>, Saeed Hassanpour, PhD<sup>1,3,4\*</sup>

<sup>1</sup>Department of Biomedical Data Science, Geisel School of Medicine at Dartmouth, Hanover, NH 03755, USA

<sup>2</sup>Department of Pathology and Laboratory Medicine, Dartmouth-Hitchcock Medical Center, Lebanon, NH 03756, USA

<sup>3</sup>Department of Computer Science, Dartmouth College, Hanover, NH 03755, USA

<sup>4</sup>Department of Epidemiology, Geisel School of Medicine at Dartmouth, Hanover, NH 03755, USA

\* Corresponding Author: Saeed Hassanpour, PhD

Postal address: One Medical Center Drive, HB 7261, Lebanon, NH 03756, USA

Telephone: (603) 650-1983

Email: Saeed.Hassanpour@dartmouth.edu

**SUPPLEMENTARY MATERIALS**

**Figure S1. Kaplan-Meier curves and ROC curve evaluated among patients with grade 3 gliomas. (a), (b), (c) Kaplan-Meier curves by age, IDH mutations, and WSI risk score, respectively. P-value was calculated by log-rank test. (d) ROC curves for IDH mutation prediction.**

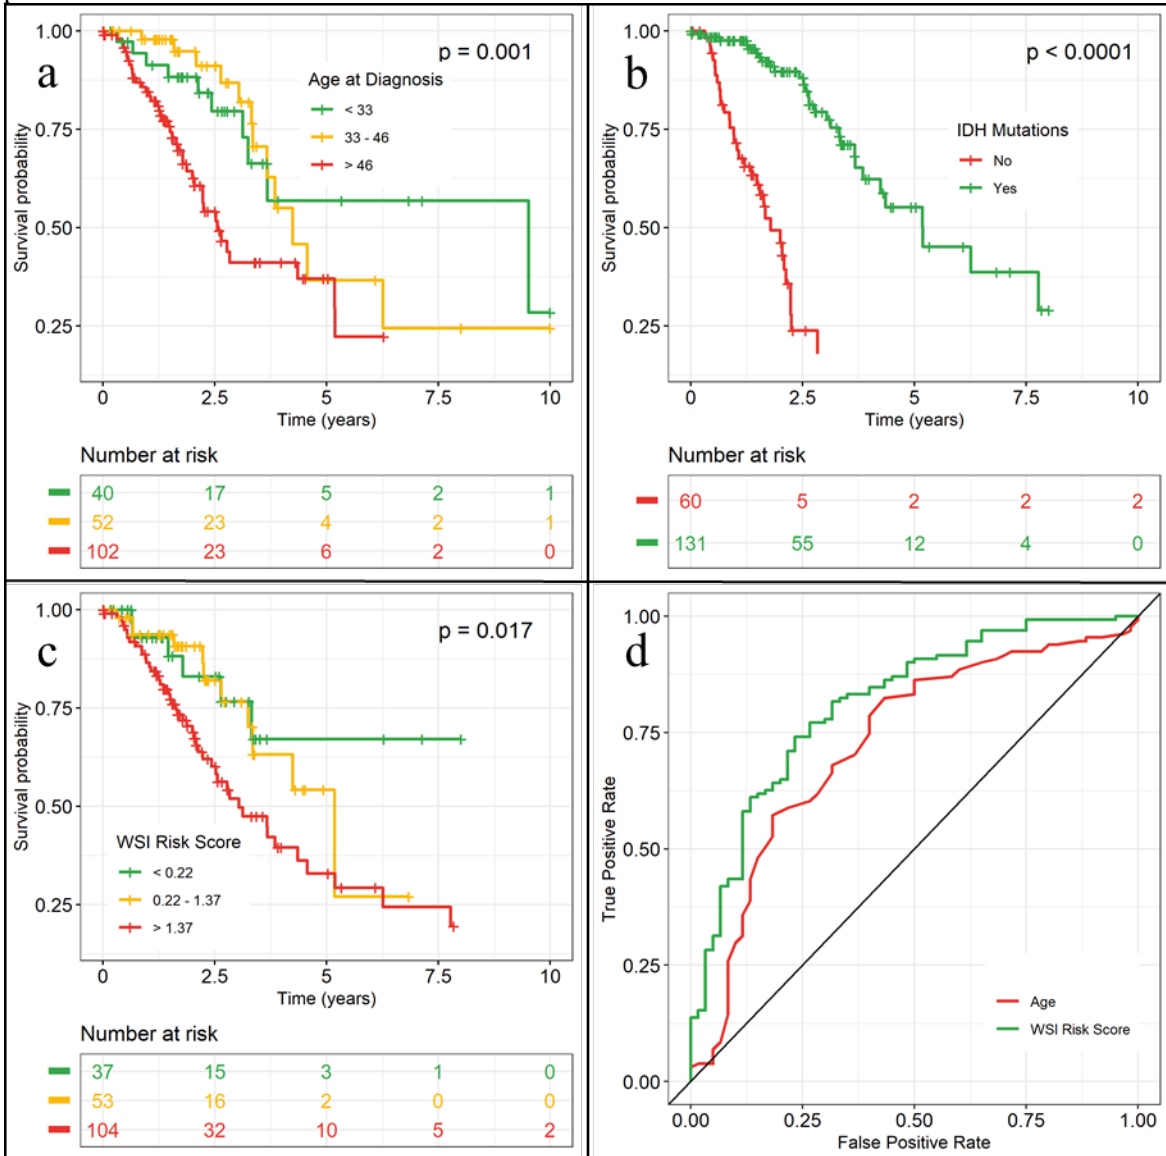

**Figure S2. Example predictions on whole slide images for IDH mutation prediction. (a)** A 33-year-old woman diagnosed with mixed glioma with an IDH mutation. **(b)** A 61-year-old woman diagnosed with mixed glioma without an IDH mutation.

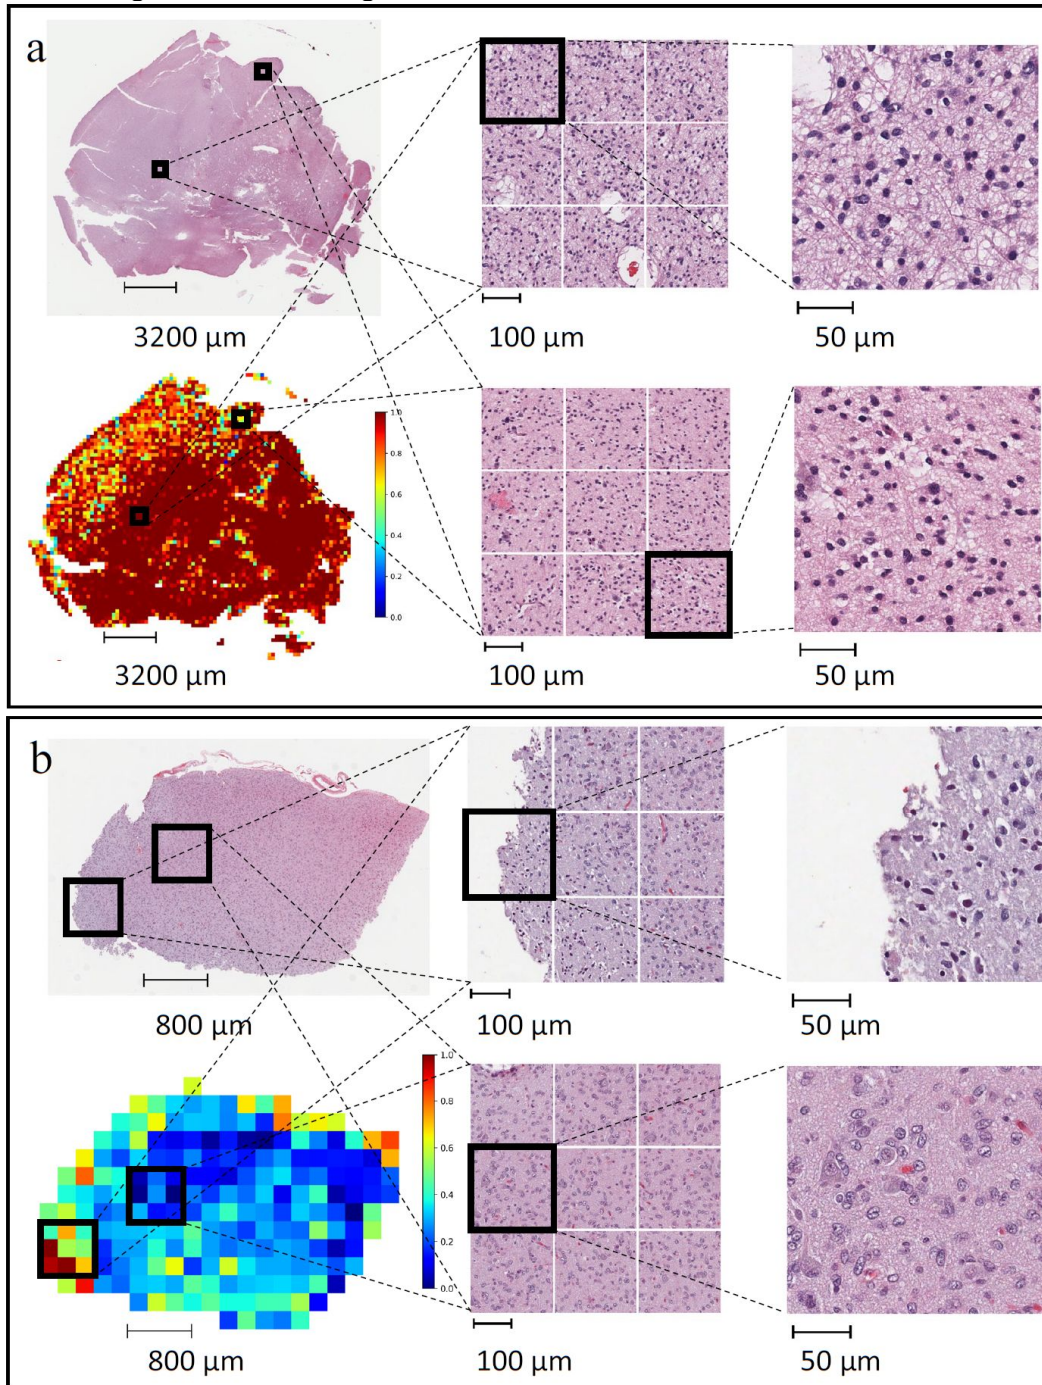

**Table S1. Distribution of baseline characteristics among patients with LGG.**

| <b>Variables</b>                 | <b>Mean (SD) / N (%)</b> |
|----------------------------------|--------------------------|
| Age                              | 40.9 (13.0)              |
| Gender                           |                          |
| Male                             | 165 (55.7%)              |
| Female                           | 131 (44.3%)              |
| Race                             |                          |
| White                            | 271 (91.6)               |
| Black or African American        | 13 (4.4%)                |
| Asian                            | 5 (1.7%)                 |
| American Indian or Alaska native | 1 (0.3%)                 |
| Not reported                     | 6 (2.0%)                 |
| Primary diagnosis                |                          |
| Astrocytoma                      | 59 (19.9%)               |
| Oligoastrocytoma (Mixed Glioma)  | 130 (43.9%)              |
| Oligodendroglioma                | 107 (36.1%)              |
| IDH mutations                    |                          |
| IDH1 mutation                    | 231 (80.2%)              |
| IDH2 mutation                    | 13 (4.5%)                |
| Either IDH1 or IDH2 mutation     | 244 (84.7%)              |

**Table S2. Distribution of baseline characteristics among patients with grade 3 gliomas.**

| <b>Variables</b>                 | <b>Mean (SD) / N (%)</b> |
|----------------------------------|--------------------------|
| Age                              | 46.6 (13.3)              |
| Gender                           |                          |
| Male                             | 106 (54.6%)              |
| Female                           | 88 (45.4%)               |
| Race                             |                          |
| White                            | 181 (93.3%)              |
| Black or African American        | 7 (3.6%)                 |
| Asian                            | 2 (1.0%)                 |
| American Indian or Alaska native | -                        |
| Not reported                     | 4 (2.1%)                 |
| Primary diagnosis                |                          |
| Anaplastic Astrocytoma           | 122 (62.9%)              |
| Anaplastic Oligodendroglioma     | 72 (37.1%)               |
| IDH mutations                    |                          |
| IDH1 mutation                    | 125 (65.4%)              |
| IDH2 mutation                    | 6 (3.1%)                 |
| Either IDH1 or IDH2 mutation     | 131 (68.6%)              |

**Table S3. Model performance statistics for survival prediction task and IDH mutation prediction task, evaluated among patients with grade 3 gliomas. 95% confidence intervals were derived from 10,000 bootstrapping replications. Bold texts indicate best performance for each column. \* indicates statistically significant difference (p < 0.05).**

| <b>Survival prediction performance: C-index [95% CI]</b> |                                                       |                                                    |                       |
|----------------------------------------------------------|-------------------------------------------------------|----------------------------------------------------|-----------------------|
|                                                          | <b>Without WSI Risk Score</b>                         | <b>With WSI Risk Score</b>                         | <b>Difference</b>     |
| None                                                     | -                                                     | 0.654 [0.537, 0.768]                               | -                     |
| Age                                                      | 0.729 [0.616, 0.833]                                  | 0.758 [0.660, 0.845]                               | 0.029 [-0.041, 0.082] |
| Gender                                                   | 0.514 [0.370, 0.613]                                  | 0.652 [0.536, 0.757]                               | 0.138 [-0.006, 0.287] |
| Race                                                     | 0.501 [0.445, 0.550]                                  | 0.644 [0.528, 0.760]                               | 0.143 [0.028, 0.259]* |
| Primary diagnosis                                        | 0.563 [0.375, 0.646]                                  | 0.661 [0.544, 0.775]                               | 0.098 [-0.014, 0.286] |
| IDH mutations                                            | 0.724 [0.640, 0.803]                                  | 0.757 [0.657, 0.844]                               | 0.033 [-0.040, 0.092] |
| Age+IDH mutations                                        | <b>0.786 [0.683, 0.877]</b>                           | <b>0.792 [0.701, 0.876]</b>                        | 0.006 [-0.035, 0.037] |
| <b>IDH mutation prediction performance: AUC [95% CI]</b> |                                                       |                                                    |                       |
|                                                          | <b>Without WSI Predicted IDH Mutation Probability</b> | <b>With WSI Predicted IDH Mutation Probability</b> | <b>Difference</b>     |
| None                                                     | -                                                     | 0.814 [0.721, 0.897]                               | -                     |
| Age                                                      | <b>0.728 [0.619, 0.833]</b>                           | <b>0.845 [0.759, 0.919]</b>                        | 0.117 [0.001, 0.198]* |
| Gender                                                   | 0.521 [0.417, 0.618]                                  | 0.807 [0.713, 0.893]                               | 0.286 [0.146, 0.415]* |
| Race                                                     | 0.499 [0.440, 0.545]                                  | 0.812 [0.708, 0.901]                               | 0.313 [0.210, 0.415]* |
| Primary diagnosis                                        | 0.646 [0.556, 0.732]                                  | 0.834 [0.740, 0.915]                               | 0.188 [0.091, 0.264]* |
| Age + Race                                               | 0.716 [0.600, 0.821]                                  | 0.842 [0.739, 0.917]                               | 0.126 [0.014, 0.211]* |
